# Supplementary material for: Glacial History of the North Atlantic Marine Snail, Littorina saxatilis, Inferred from Distribution of Mitochondrial DNA Lineages
Source: PLoS One. 2011 Mar 11;6(3):e17511. doi: 10.1371/journal.pone.0017511 (PMC3055875; doi:10.1371/journal.pone.0017511)
Supplement: Table S5 — Probability calculations of pairwise comparisons for IMa parameter estimates. (XLS) [file pone.0017511.s006.xls]

## Sheet: Sheet1
Table S5. Pairwise comparisons of IMa parameter estimates according to the method [40].
Cells highlighted in yellow represent statistically significant comparisons (i.e., those greater than or equal to 0.85 or less than or equal to 0.15, according to [40]).
Effective population size (θ) comparisons	NEA+ISL	NEA	NEA(S)	NEA(MAIN)	BI	SPAIN	ISL	NWA	NWA(S)	CAN	USSOUTH	VENICE	EUROPE(S)
NEA+ISL	--							0.61	0.95	1	0.99	1
NEA		--					1	0.36	0.93	1	0.95
NEA(S)			--				0.9	0.5	0.91	0.98	0.87
NEA(MAIN)				--	0.14	0.97	0.99	0.01	0.68	0.7	0.15
BI				0.86	--	0.99	0.99	0.08	0.2
SPAIN				0.03	0.01	--	0.89	0	0.15
ISL		0	0.1	0.01	0.01	0.11	--	0.01	0.52	0.03	0.01
NWA	0.39	0.64	0.5	0.99	0.92	1	0.99	--
NWA(S)	0.05	0.07	0.09	0.32	0.8	0.85	0.48		--
CAN	0	0	0.02	0.3			0.97			--	0.13
USSOUTH	0.01	0.05	0.13	0.85			0.99			0.87	--
VENICE	0											--	0
EUROPE(S)												1	--
Migration rate (m/mu) comparisons	NEA+ISL -> NWA	NWA -> NEA+ISL	NEA -> NWA	NWA -> NEA	NEA -> ISL	ISL -> NEA	NEA(S) -> ISL	ISL -> NEA(S)	NEA(MAIN) -> CAN	CAN -> NEA(MAIN)	NEA(MAIN) -> USSOUTH	USSOUTH -> NEA(MAIN)	NWA -> ISL	ISL -> NWA	NWA(S) -> ISL	ISL -> NWA(S)	NEA(MAIN) -> BI	BI -> NEA(MAIN)	NEA(MAIN) -> SPAIN	SPAIN -> NEA(MAIN)	NEA+ISL -> VENICE	VENICE -> NEA+ISL	EUROPE(S) -> VENICE	VENICE -> EUROPE(S)	Migration rate (m/mu) comparisons
NEA+ISL -> NWA	--	0.7	0.5	0.65	0.05	0.01	0.02	0.12	0.04	0.62	0.4	0.7	0.6	0.3	0.15	0.02									NEA+ISL -> NWA
NWA -> NEA+ISL	0.3	--	0.28	0.43	0.05	0.01	0.02	0.1	0.01	0.48	0.42	0.5	0.48	0.14	0.11	0.01									NWA -> NEA+ISL
NEA -> NWA	0.5	0.72	--	0.65	0.07	0.01	0.03	0.18	0.04	0.34	0.36	0.7	0.62	0.35	0.15	0.03									NEA -> NWA
NWA -> NEA	0.35	0.57	0.35	--	0.04	0.01	0.02	0.12	0.01	0.45	0.45	0.58	0.52	0.2	0.11	0.01									NWA -> NEA
NEA -> ISL	0.95	0.95	0.93	0.96	--	0.36	0.43	0.67	0.7	0.95	0.95	0.096	0.95	0.9	0.64	0.46									NEA -> ISL
ISL -> NEA	0.99	0.99	0.99	0.99	0.64	--	0.45	0.77	0.9	0.99	0.99	0.99	0.99	0.98	0.6	0.8									ISL -> NEA
NEA(S) -> ISL	0.98	0.98	0.97	0.98	0.57	0.55	--	0.3	0.83	0.98	0.97	0.98	0.97	0.95	0.7	0.5									NEA(S) -> ISL
ISL -> NEA(S)	0.88	0.9	0.82	0.88	0.33	0.33	0.7	--	0.5	0.86	0.84	0.88	0.84	0.7	0.51	0.3									ISL -> NEA(S)
NEA(MAIN) -> CAN	0.96	0.99	0.96	0.99	0.3	0.1	0.17	0.5	--	0.96	0.97	0.98	0.96	0.94	0.48	0.15									NEA(MAIN) -> CAN
CAN -> NEA(MAIN)	0.38	0.52	0.66	0.55	0.05	0.01	0.02	0.14	0.04	--	0.44	0.53	0.48	0.24	0.11	0.02									CAN -> NEA(MAIN)
NEA(MAIN) -> USSOUTH	0.6	0.58	0.64	0.55	0.05	0.01	0.03	0.16	0.03	0.56	--	0.6	0.55	0.26	0.13	0.02									NEA(MAIN) -> USSOUTH
USSOUTH -> NEA(MAIN)	0.3	0.5	0.3	0.42	0.04	0.01	0.02	0.12	0.02	0.47	0.4	--	0.47	0.2	0.1	0.01									USSOUTH -> NEA(MAIN)
NWA -> ISL	0.4	0.52	0.38	0.48	0.05	0.01	0.03	0.16	0.04	0.52	0.45	0.53	--	0.28	0.14	0.02									NWA -> ISL
ISL -> NWA	0.7	0.86	0.65	0.8	0.1	0.02	0.05	0.3	0.06	0.76	0.74	0.8	0.72	--	0.21	0.04									ISL -> NWA
NWA(S) -> ISL	0.85	0.89	0.85	0.89	0.36	0.2	0.3	0.49	0.52	0.89	0.87	0.9	0.86	0.79	--	0.27									NWA(S) -> ISL
ISL -> NWA(S)	0.98	0.99	0.97	0.99	0.56	0.4	0.5	0.7	0.85	0.98	0.98	0.99	0.98	0.96	0.73	--									ISL -> NWA(S)
NEA(MAIN) -> BI																	--	0.85	0.95	0.99	0.27	0.28	0.05	0.02	NEA(MAIN) -> BI
BI -> NEA(MAIN)																	0.15	--	0.75	0.9	0.1	0.1	0.03	0.01	BI -> NEA(MAIN)
NEA(MAIN) -> SPAIN																	0.05	0.25	--	0.7	0.05	0.1	0	0.01	NEA(MAIN) -> SPAIN
SPAIN -> NEA(MAIN)																	0.01	0.1	0.3	--	0.02	0.01	0	0.01	SPAIN -> NEA(MAIN)
NEA+ISL -> VENICE																	0.73	0.9	0.95	0.9	--	0.54	0.12	0.04	NEA+ISL -> VENICE
VENICE -> NEA+ISL																	0.72	0.9	0.98	0.99	0.46	--	0.1	0.04	VENICE -> NEA+ISL
EUROPE(S) -> VENICE																	0.95	0.97	0.99	1	0.88	0.9	--	0.4	EUROPE(S) -> VENICE
VENICE -> EUROPE(S)																	0.98	0.99	0.99	1	0.96	0.96	0.6	--	VENICE -> EUROPE(S)
Divergence time (t) comparisons	NEA+ISL-NWA	NEA-NWA	NEA-ISL	NEA(S)-ISL	NEA(MAIN)-CAN	NEA(MAIN)-USSOUTH	NWA-ISL	NWA(S)-ISL	NEA(MAIN)-BI	NEA(MAIN)-SPAIN	NEA+ISL-VENICE	EUROPE(S)-VENICE
NEA+ISL-NWA	--	0.49	0.91	0.99	0.56	0.36	0.85	0.92
NEA-NWA	0.51	--	0.9	0.99	0.6	0.37	0.86	0.9
NEA-ISL	0.09	0.1	--	0.6	0.14	0.05	0.23	0.43
NEA(S)-ISL	0.01	0.01	0.4	--	0.97	0	0.1	0.3
NEA(MAIN)-CAN	0.44	0.4	0.86	0.03	--	0.3	0.75	0.85
NEA(MAIN)-USSOUTH	0.64	0.63	0.95	1	0.7	--	0.95	0.96
NWA-ISL	0.15	0.14	0.77	0.9	0.25	0.05	--	0.69
NWA(S)-ISL	0.08	0.1	0.57	0.7	0.15	0.04	0.31	--
NEA(MAIN)-BI									--	0.14	1	1
NEA(MAIN)-SPAIN									0.86	--	1	1
NEA+ISL-VENICE									0	0	--	0.92
EUROPE(S)-VENICE									0	0	0.08	--
